# Supplementary material for: TGFβ signaling sensitizes MEKi-resistant human melanoma to targeted therapy-induced apoptosis
Source: PubMed Central journal article supplement (PMC11663225; doi:10.1038/s41419-024-07305-1), 2024-12-21
Supplement: 41419_2024_7305_MOESM7_ESM.pdf [file 41419_2024_7305_MOESM7_ESM.pdf]

# Figure 1 H

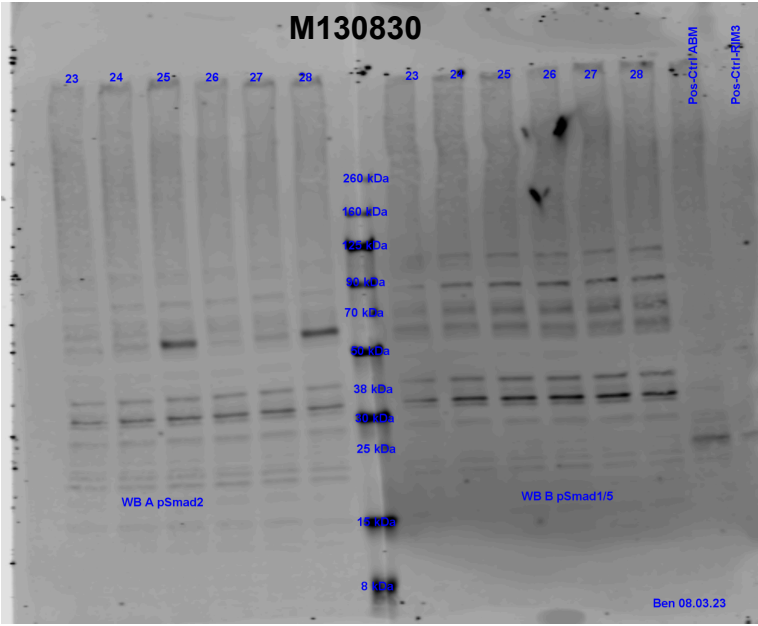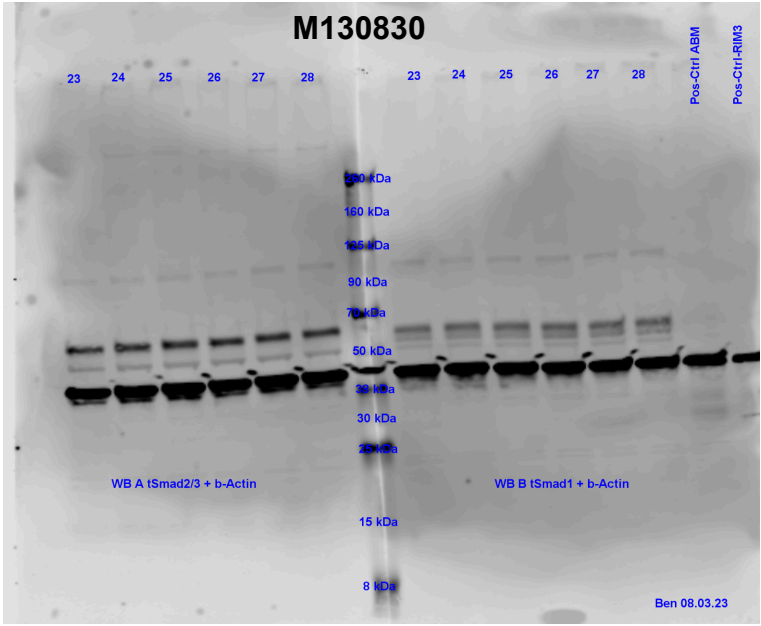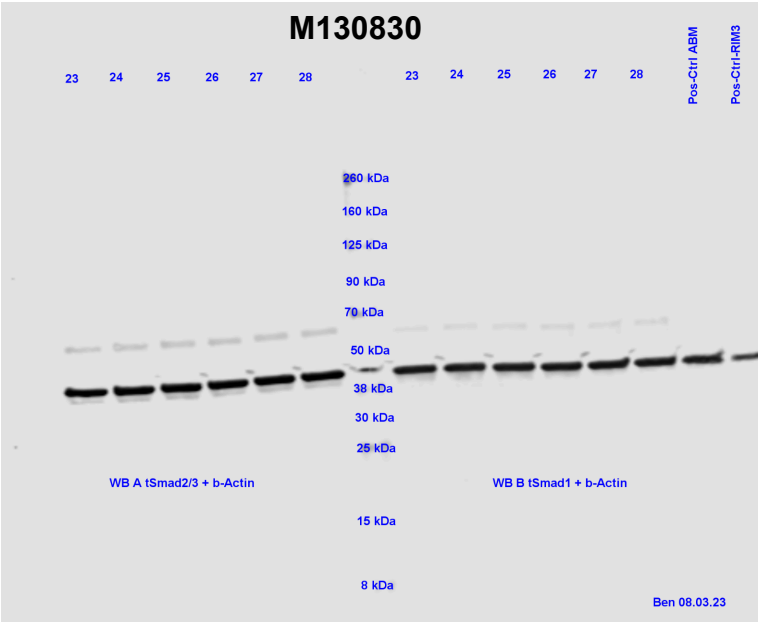

# Figure 1 I

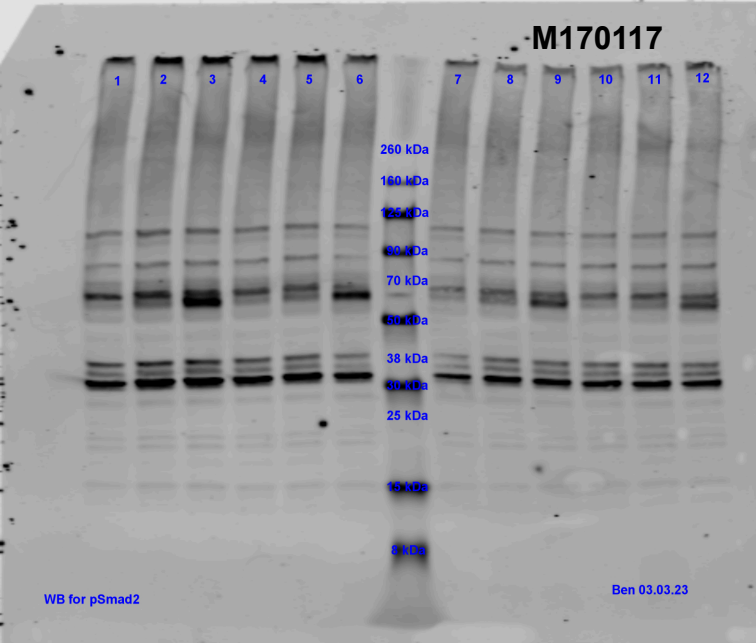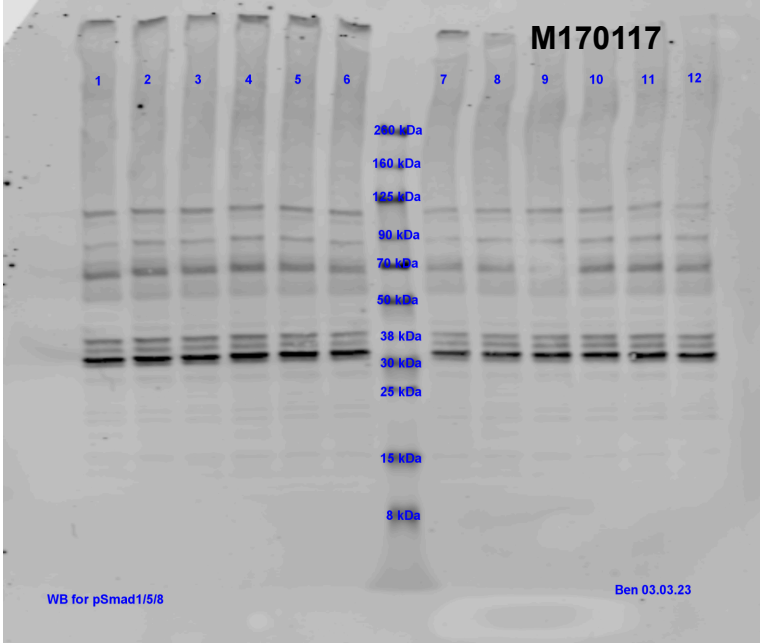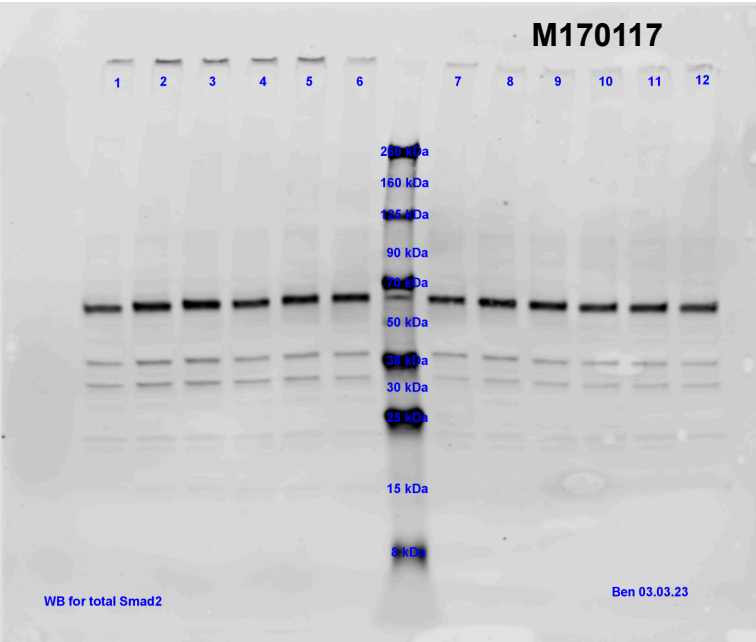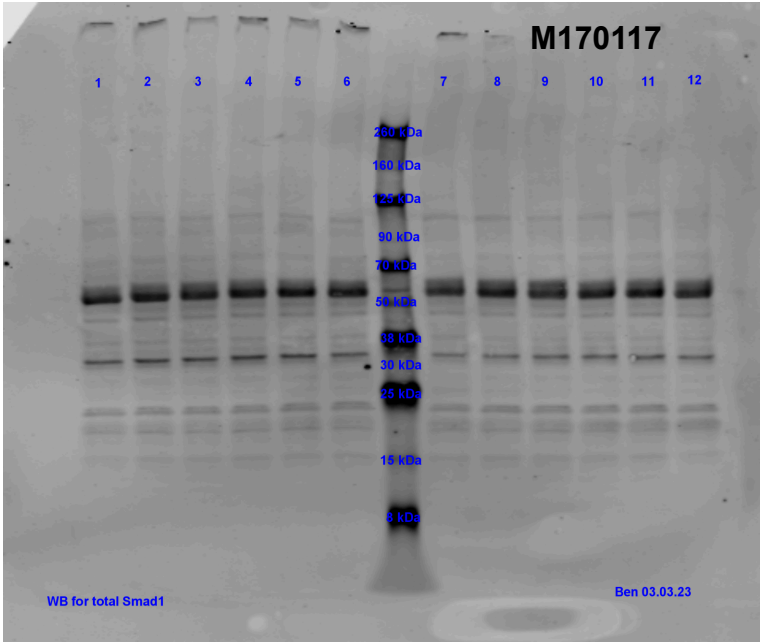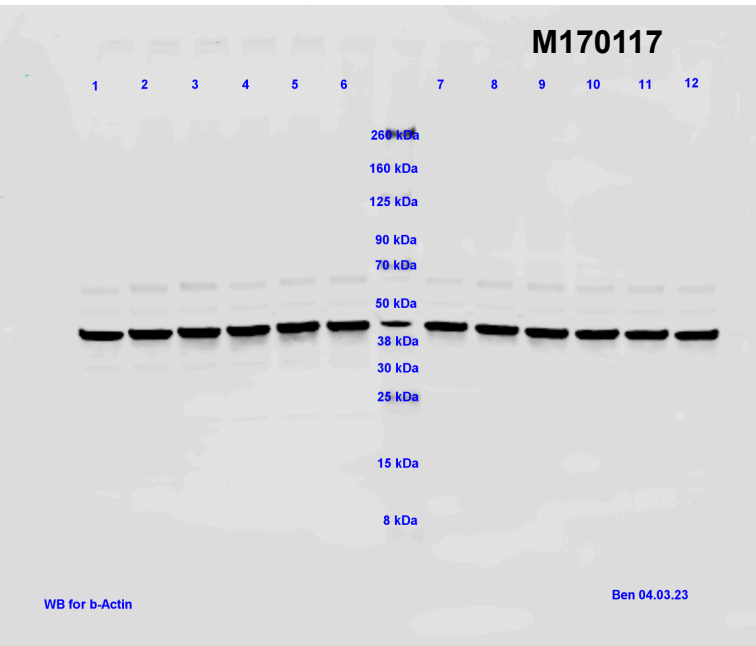

# Figure 2G

M130830

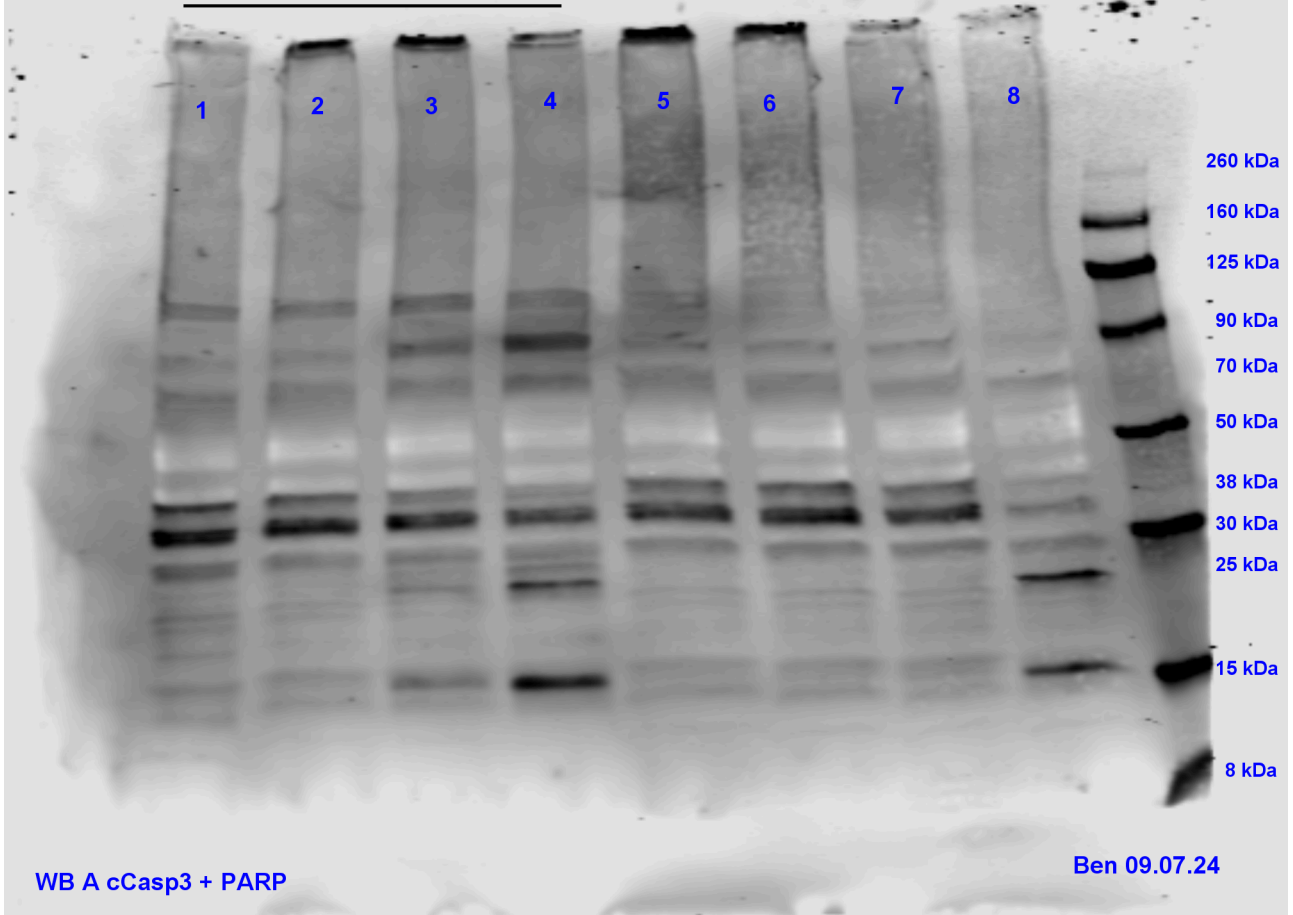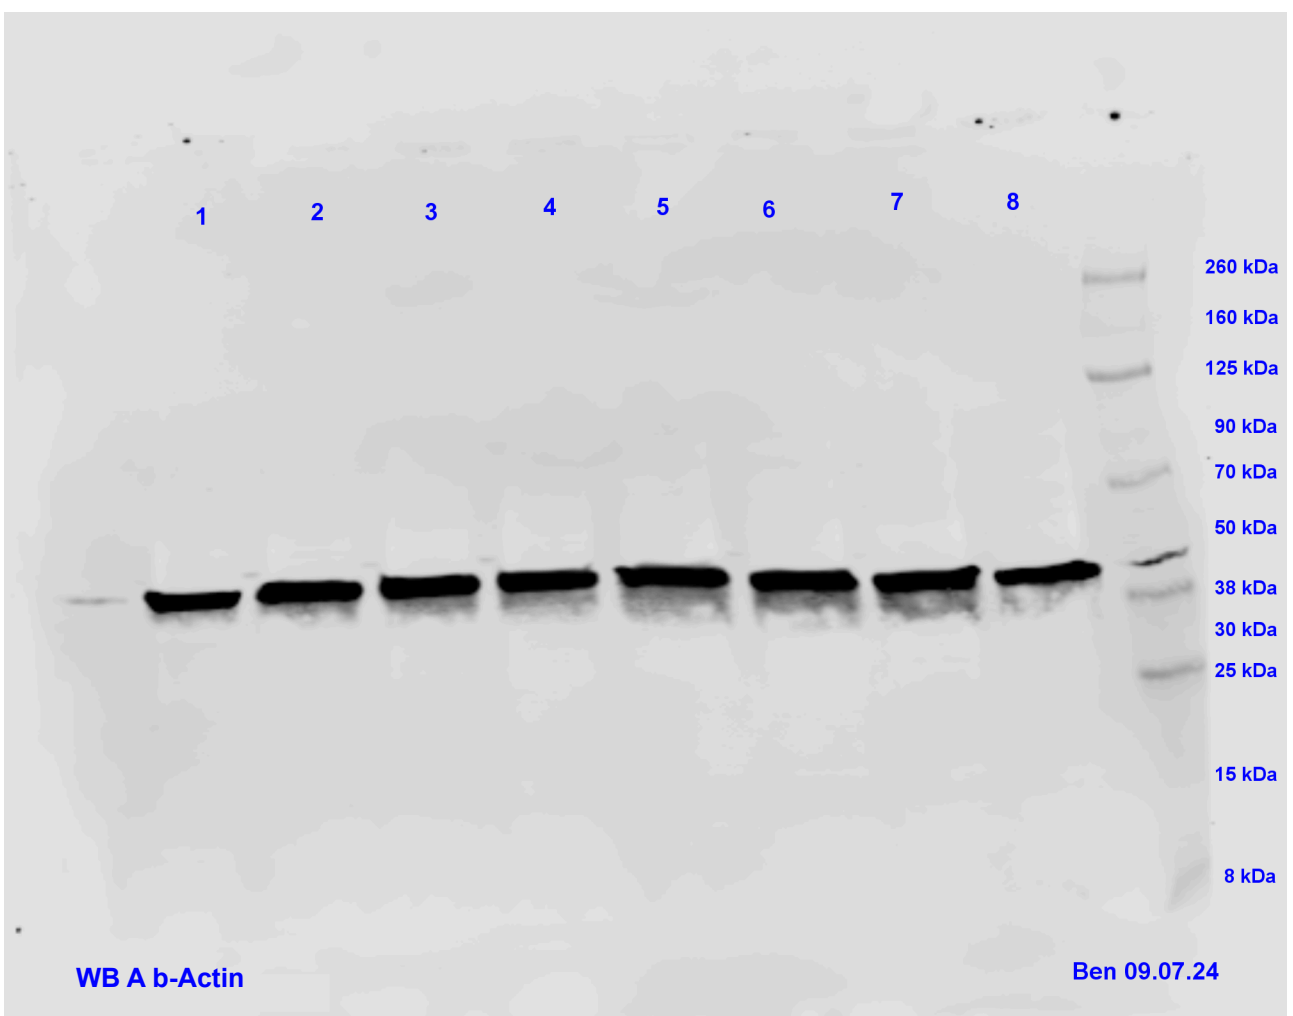

Figure 2 H + I

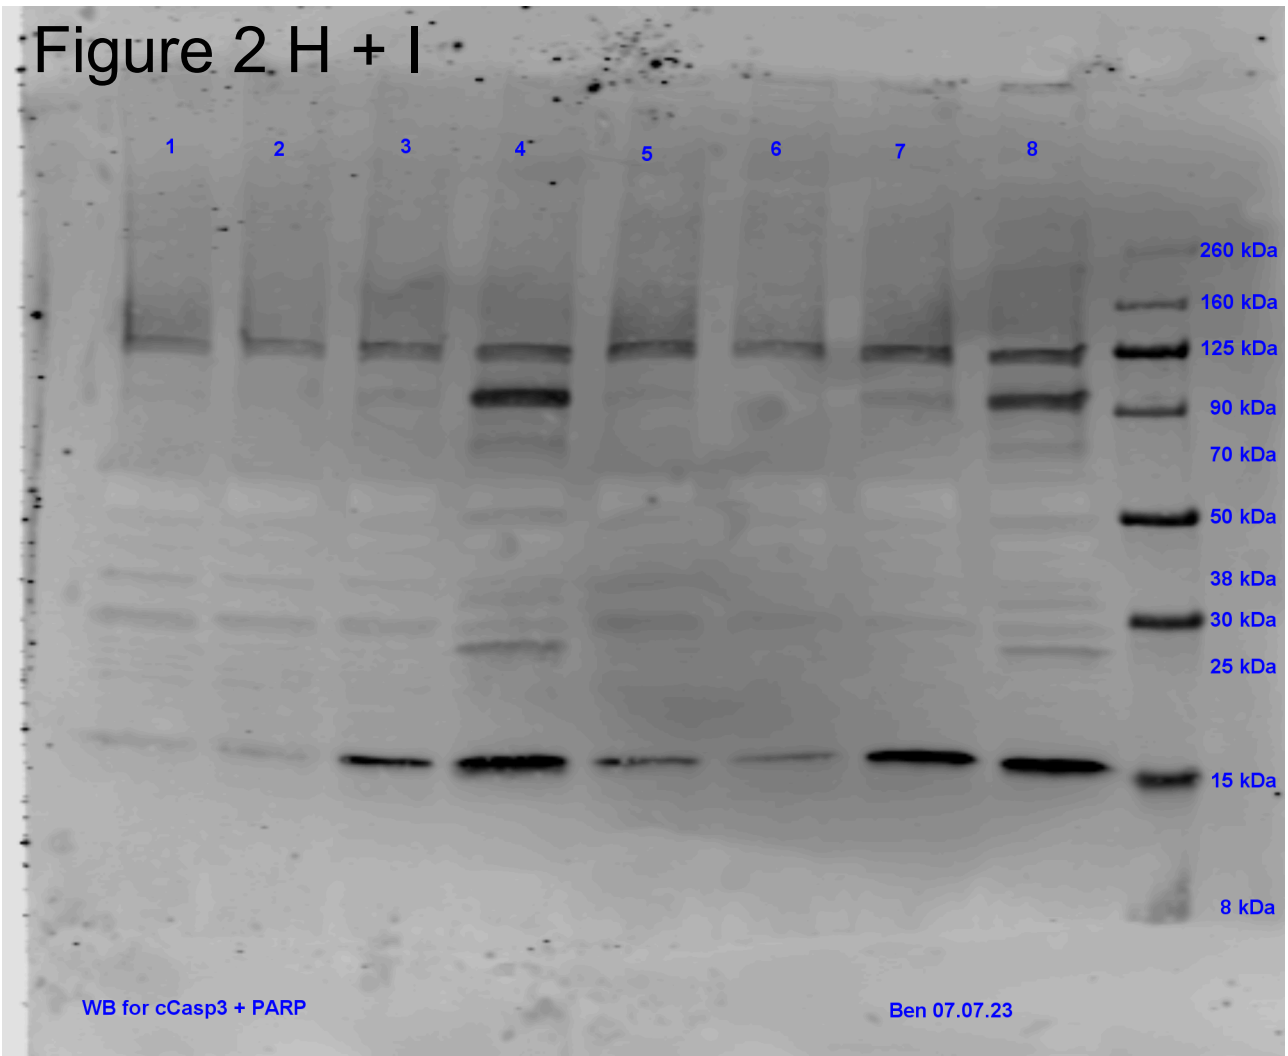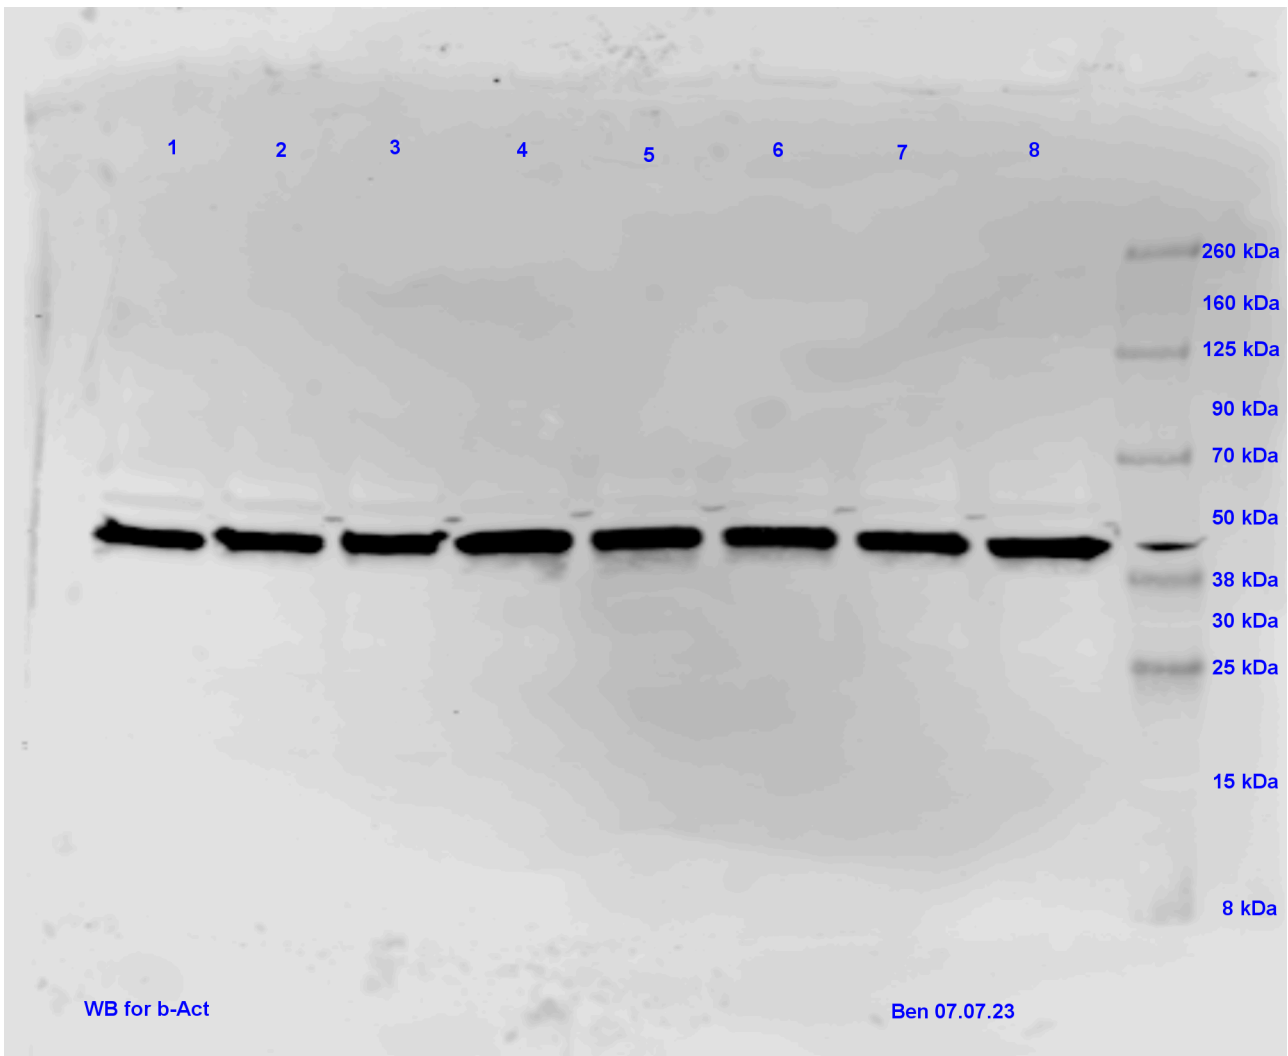

Figure 7E, part 1/2

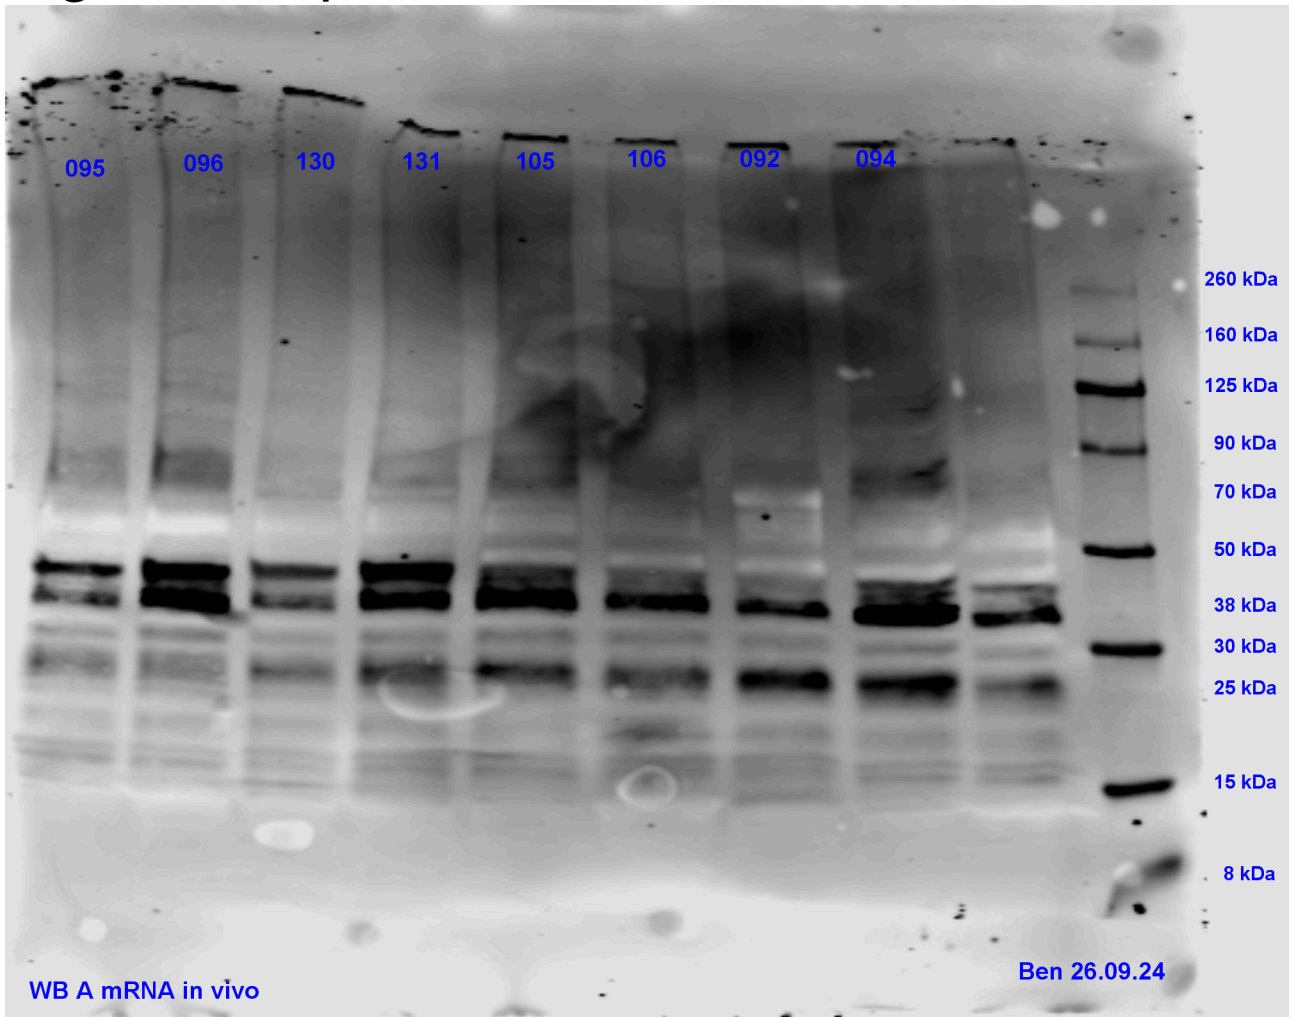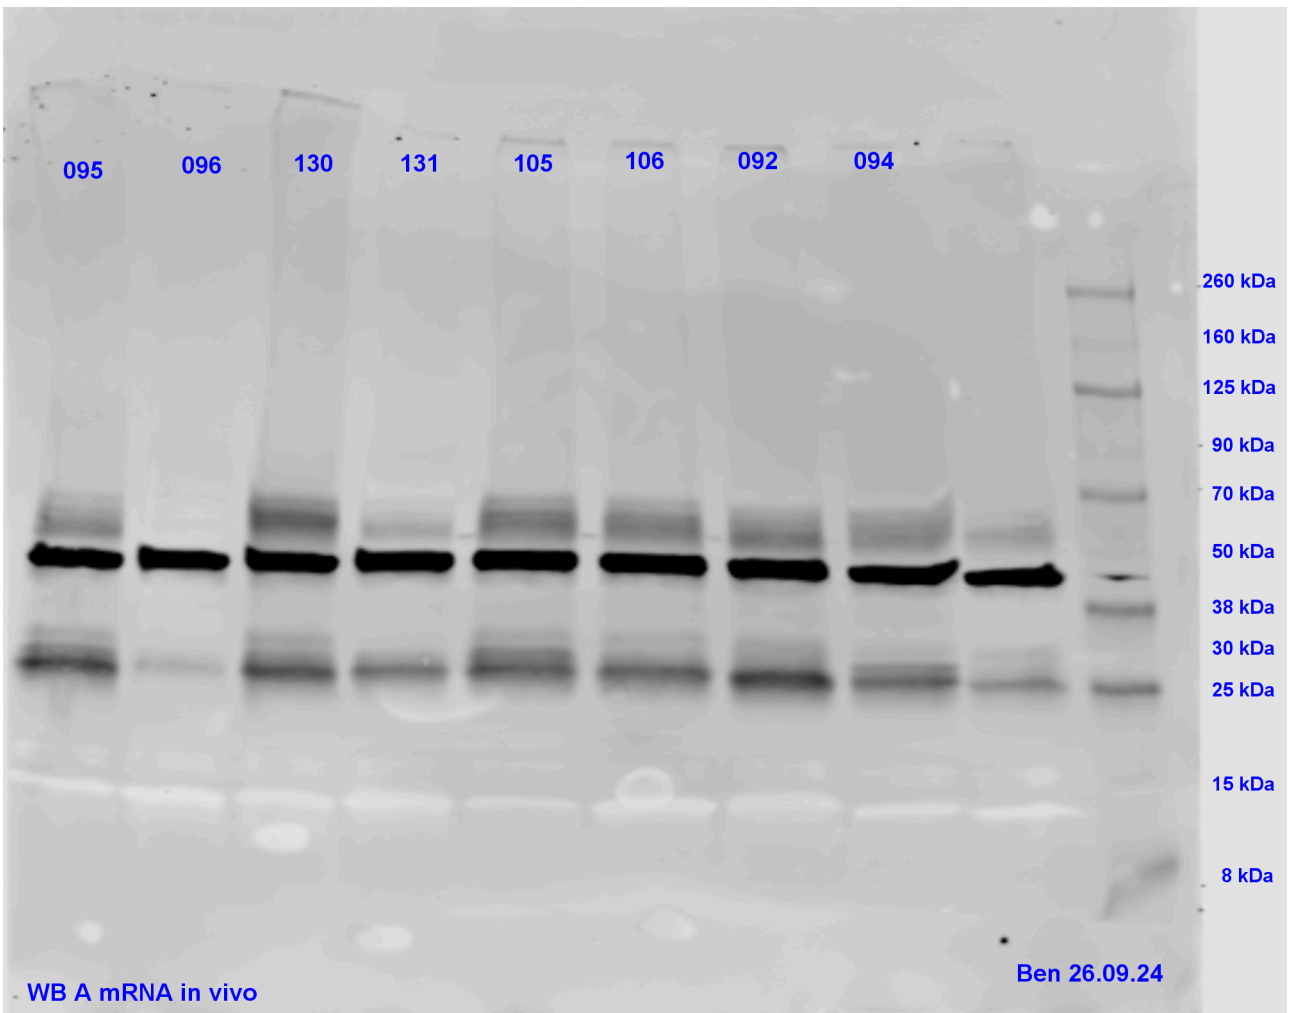

Figure 7E, part 2/2

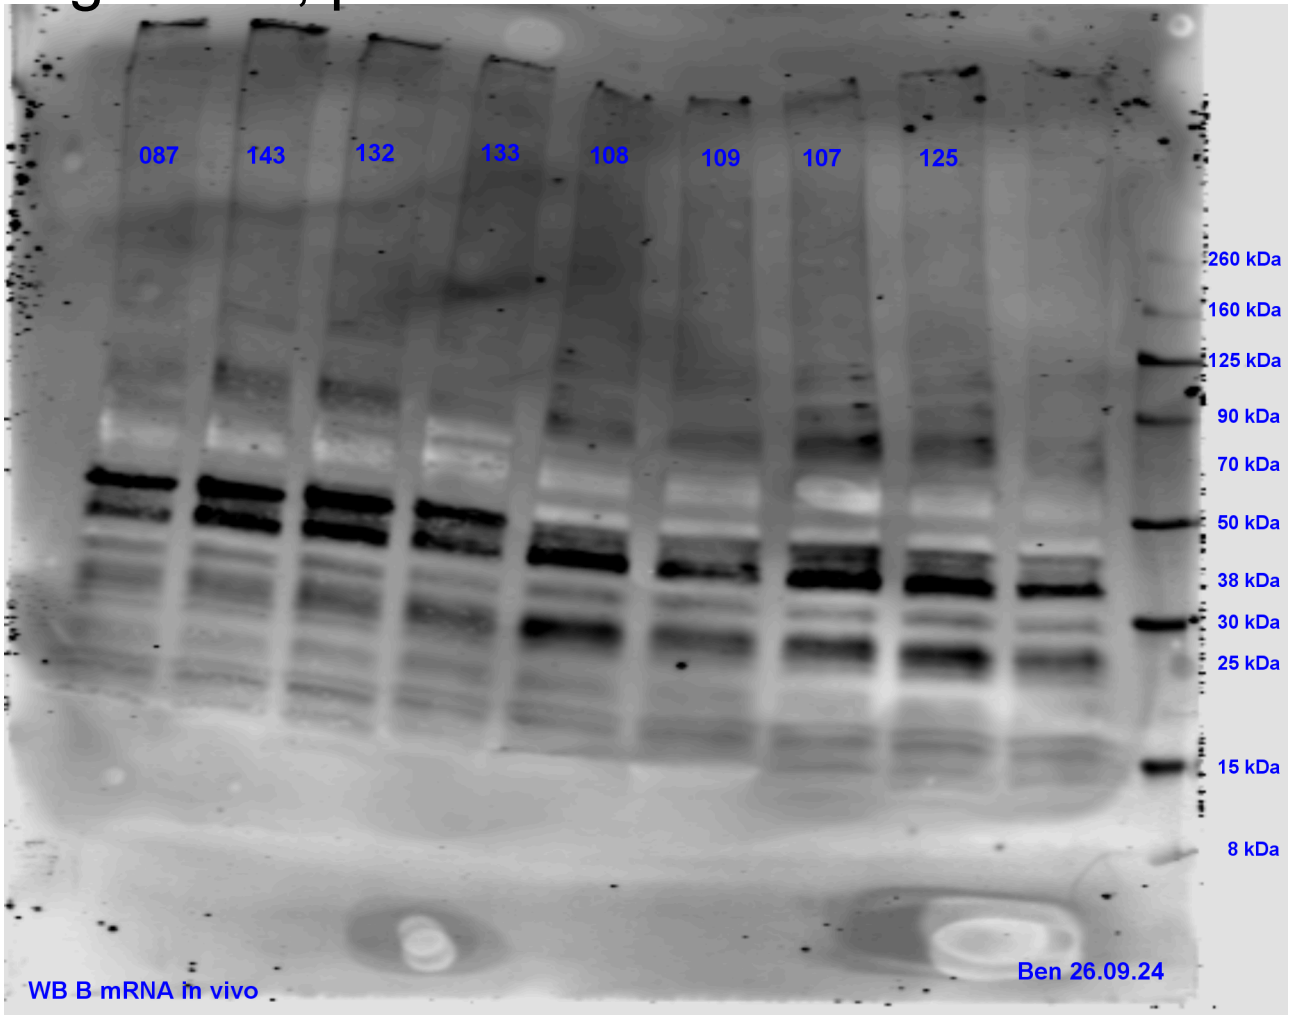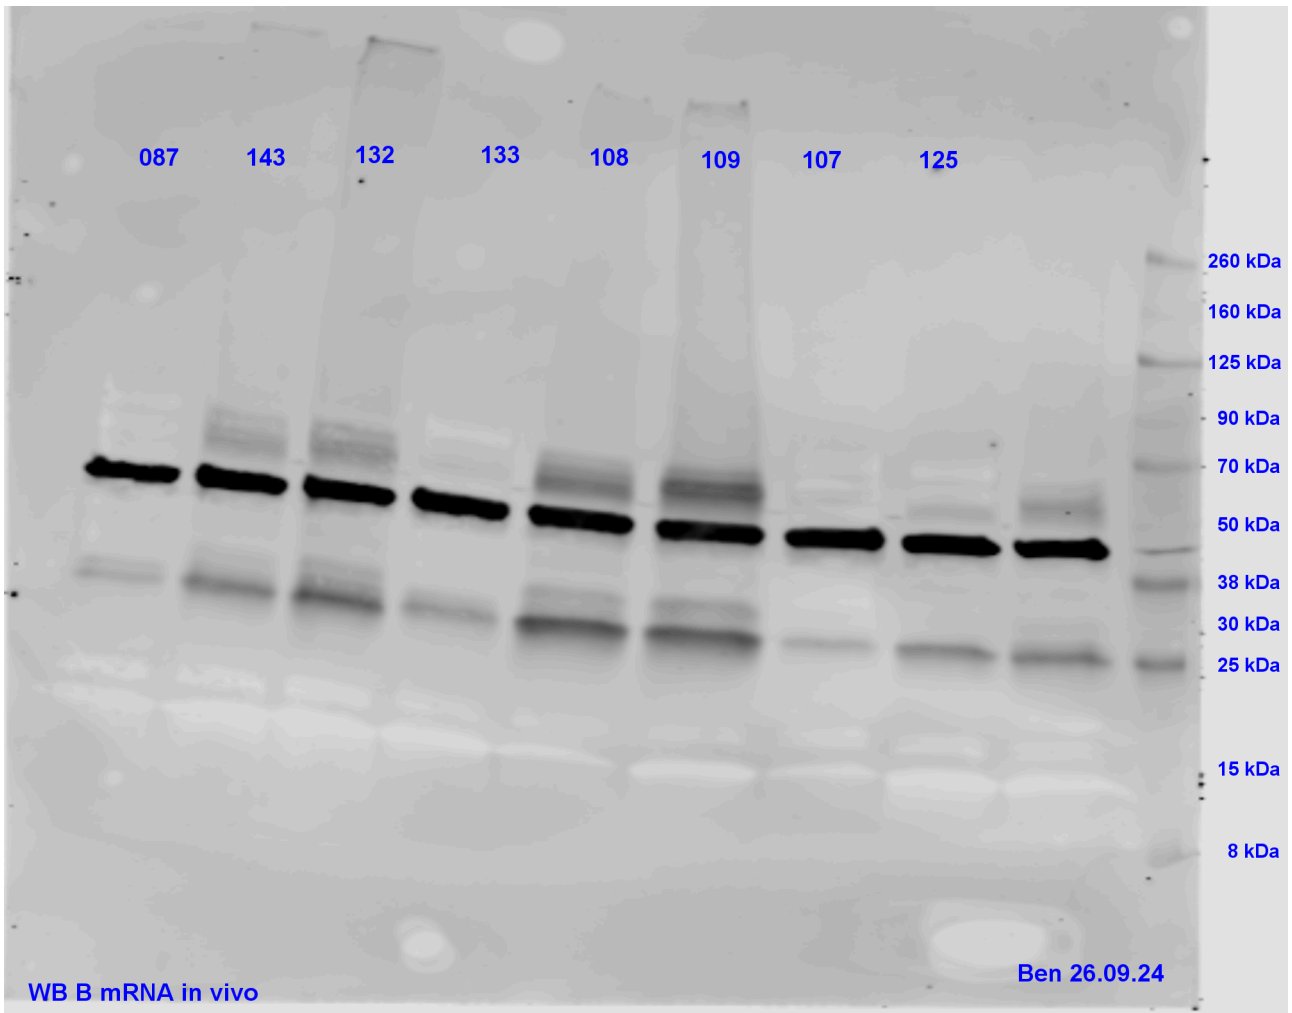

# Supplementary Figure 1A

**M130830**

**M170117**

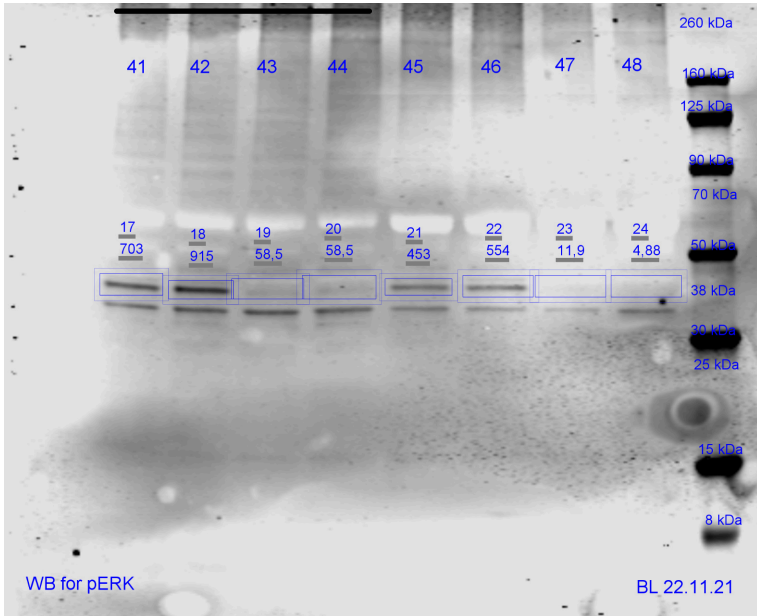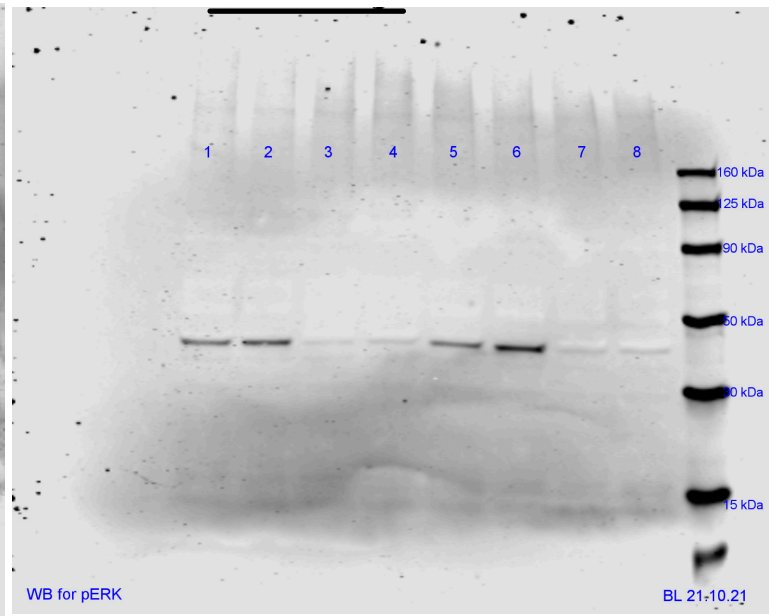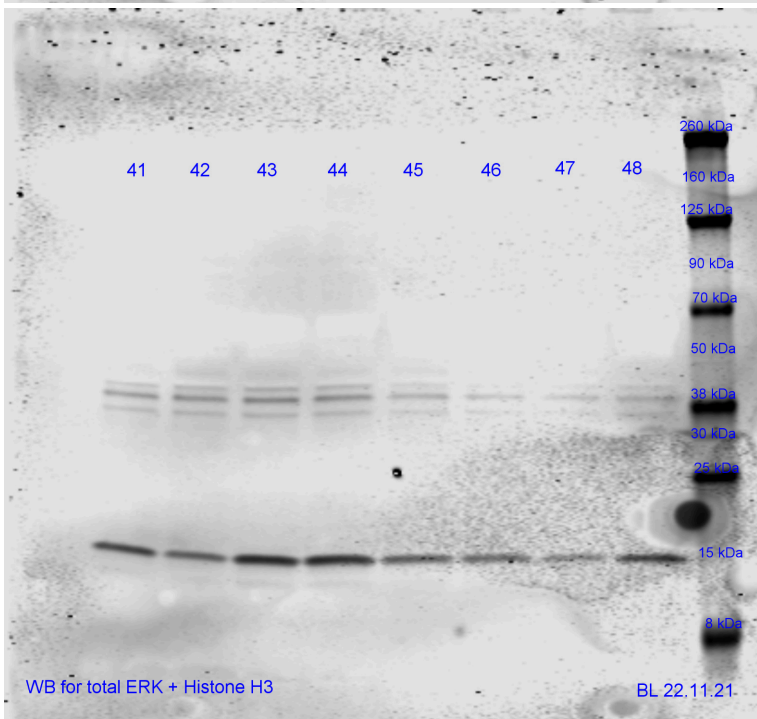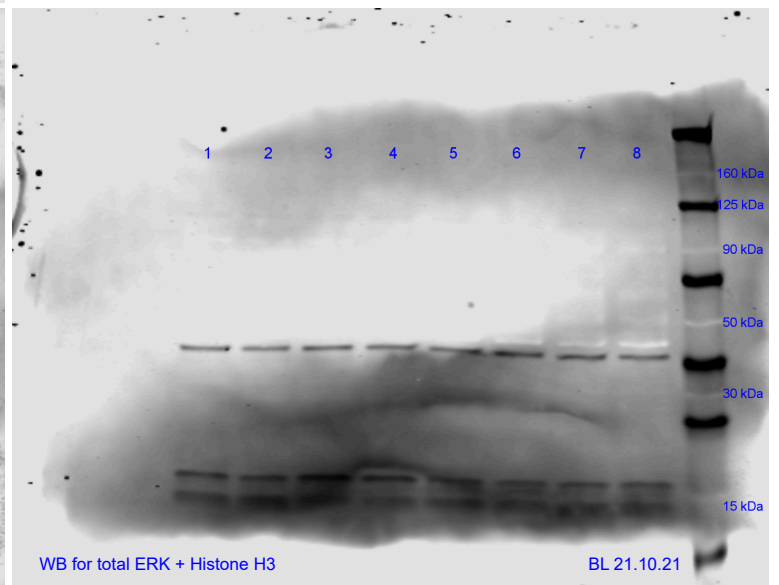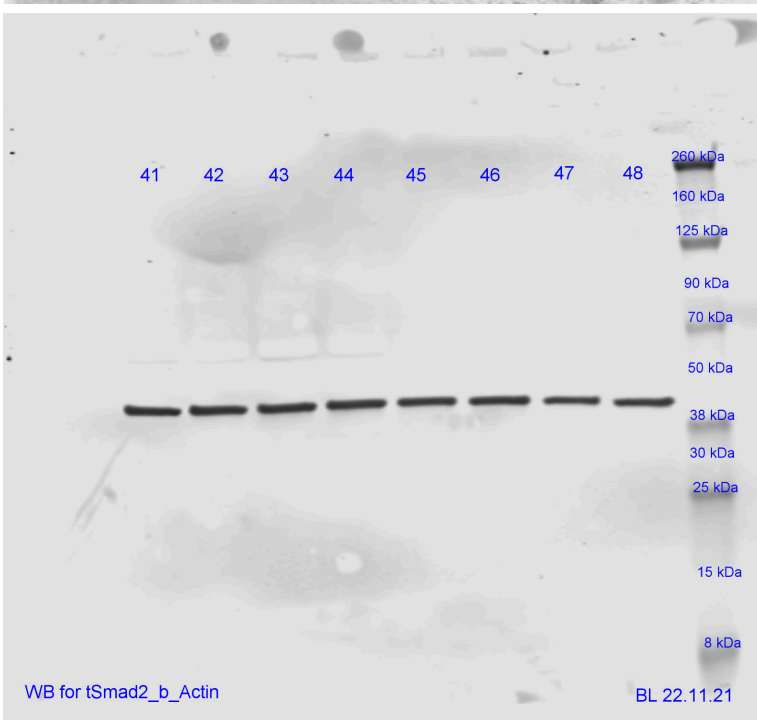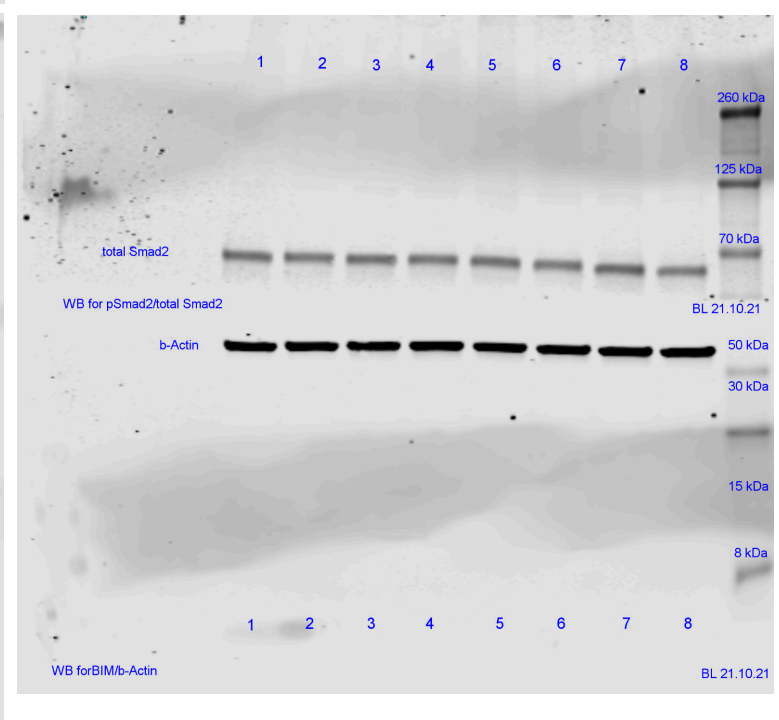

# Supplementary Figure 1A

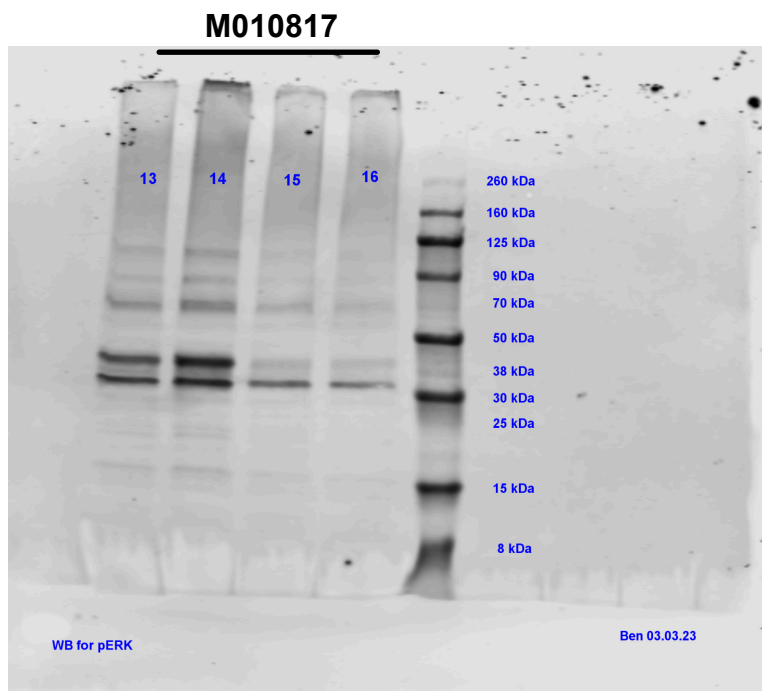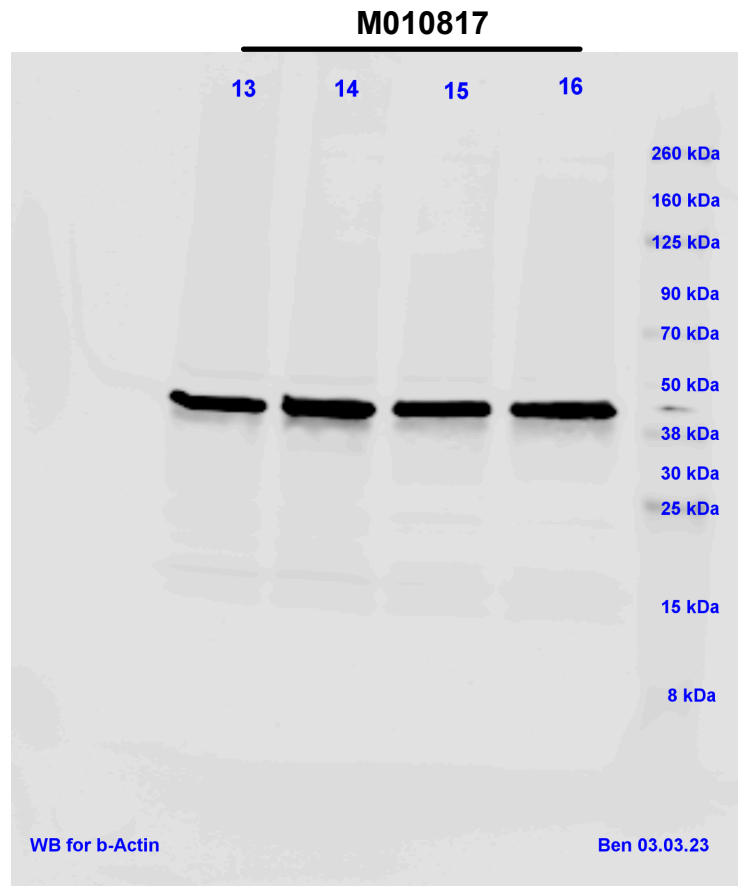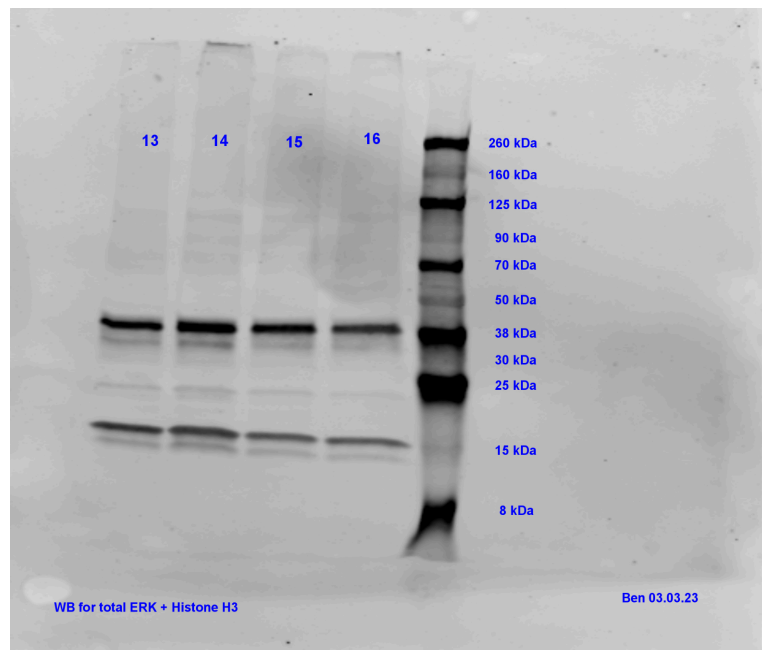



# Supplementary Figure 1A + E - G

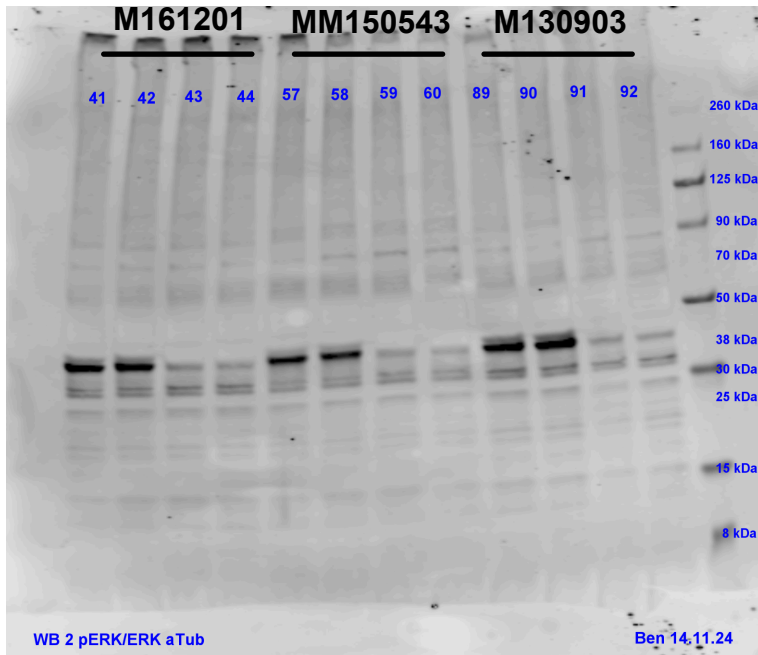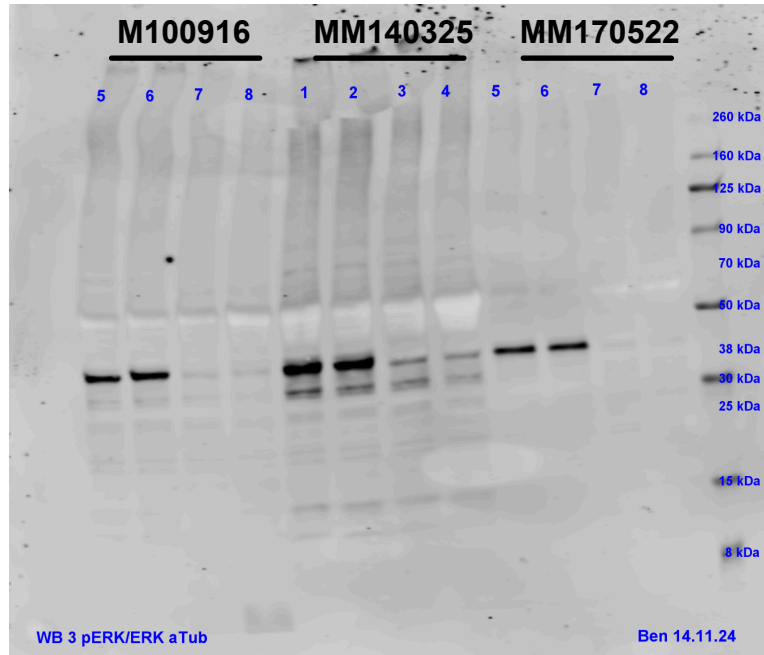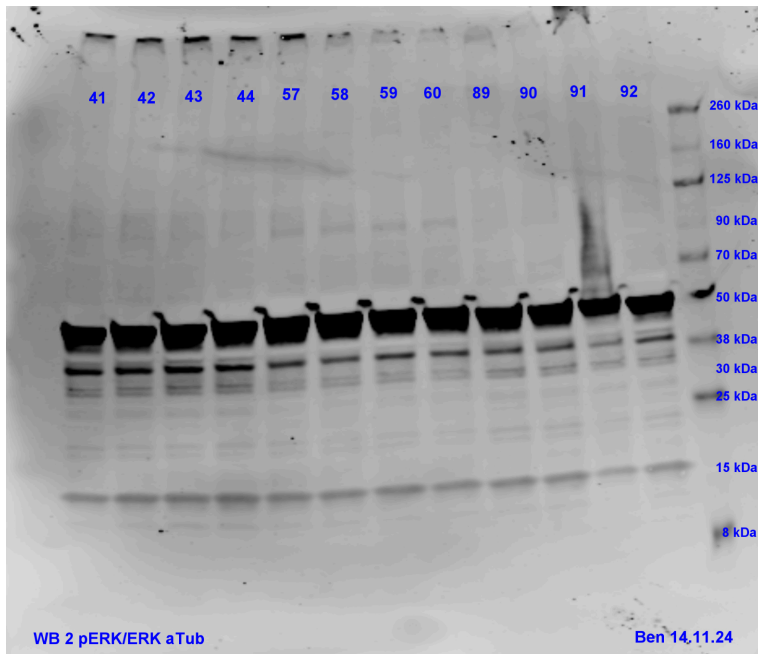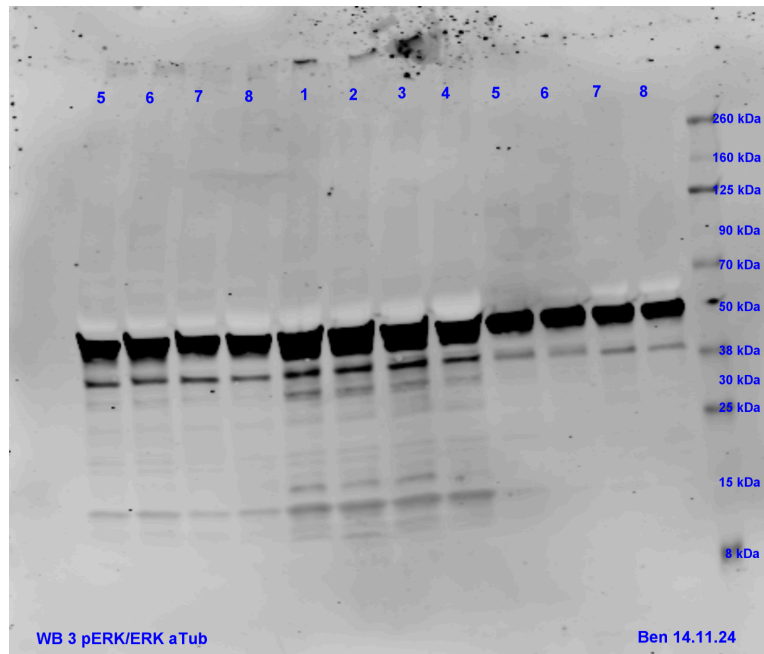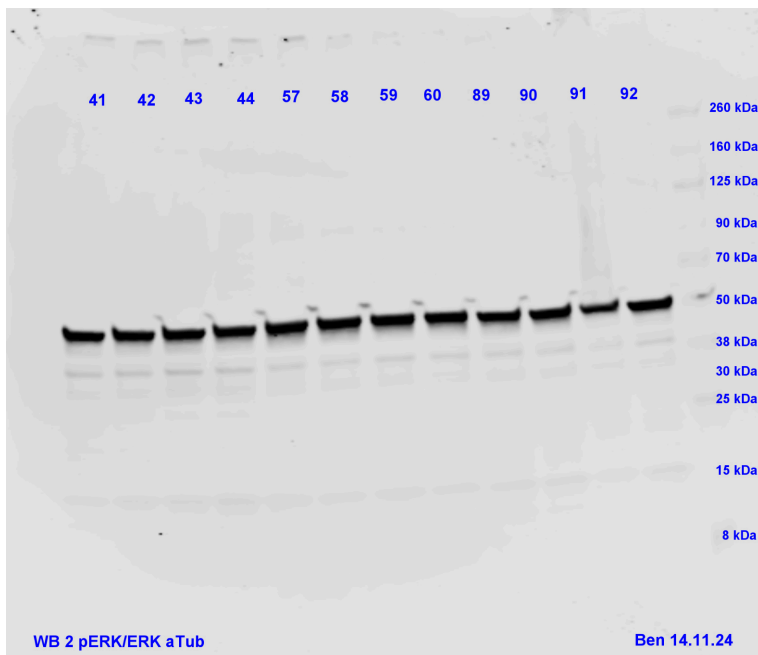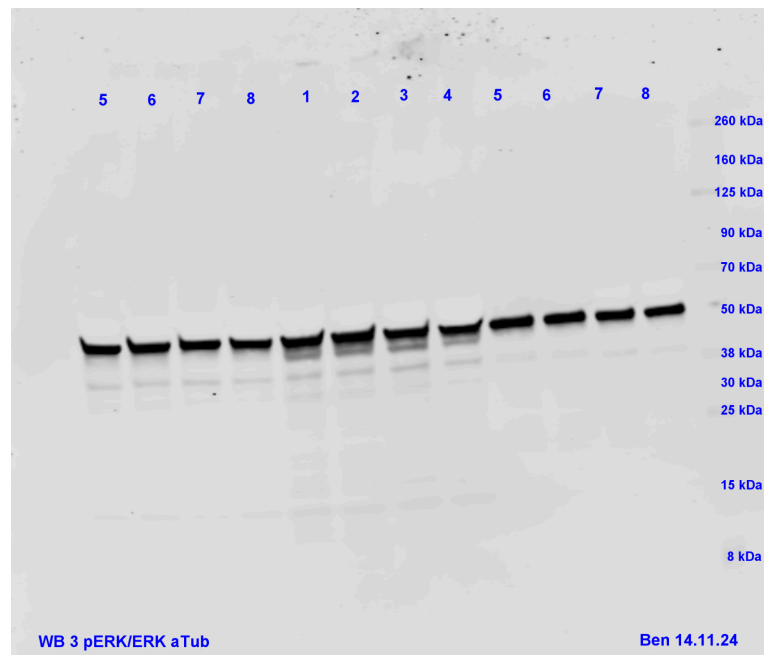

# Supplementary Figure 2D

**M130830**

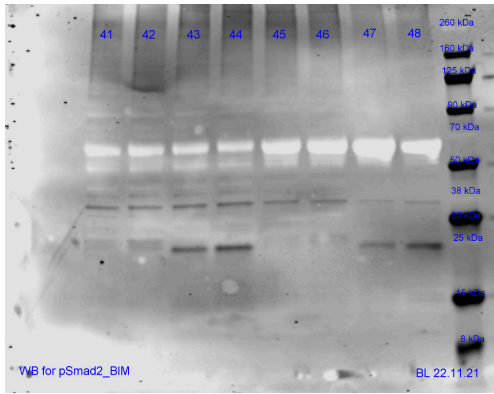

**MM150543**

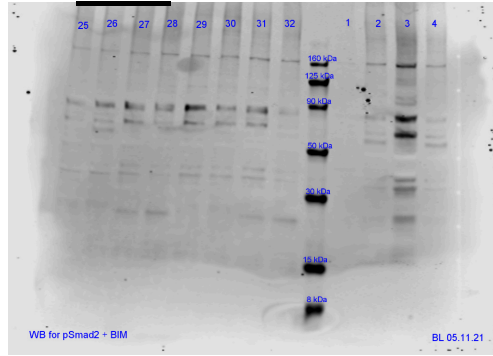

**M170117**

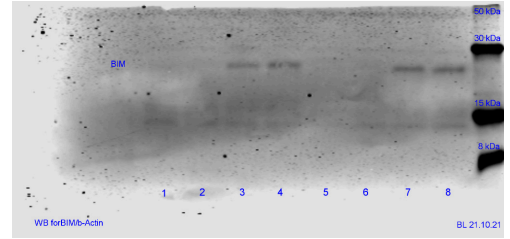

**M130830**

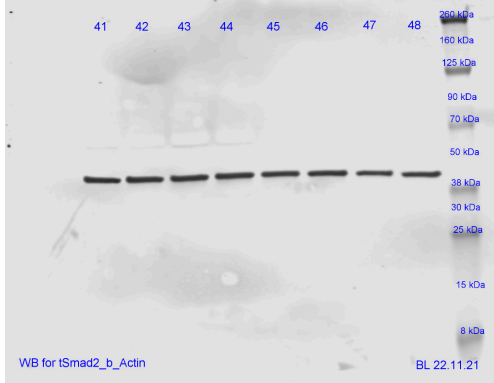

**MM150543**

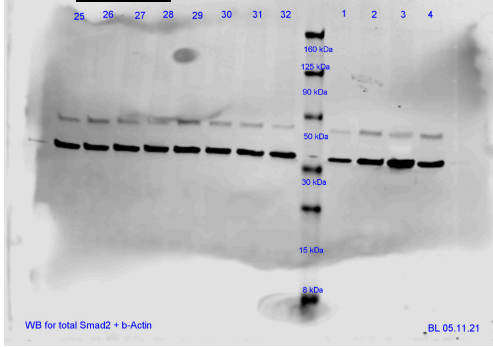

**M170117**

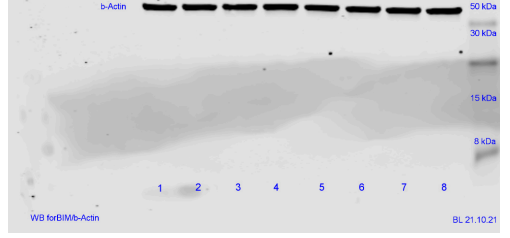

**M010817**

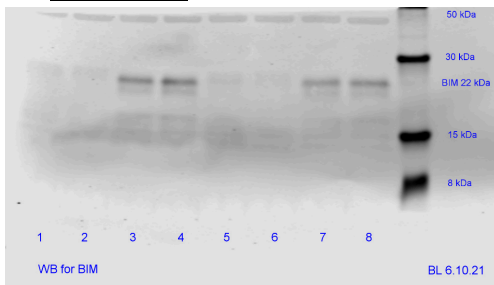

**M161201**

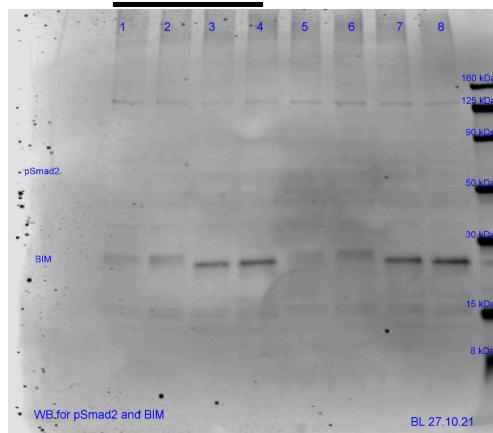

**M130903**

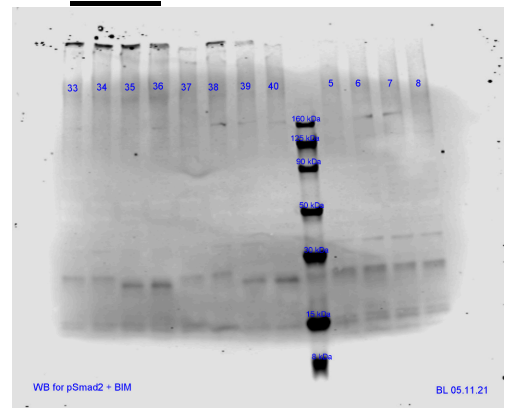

**M010817**

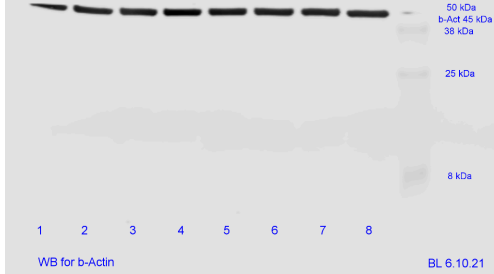

**M161201**

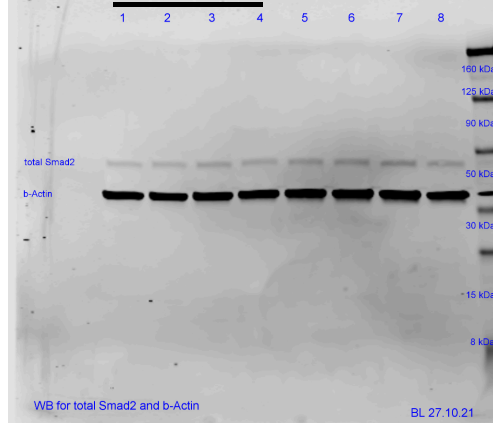

**M130903**

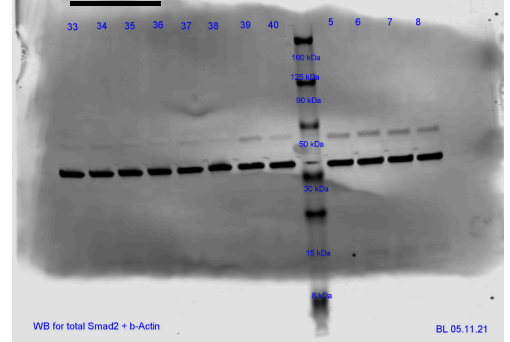

# Supplementary Figure 2D

REP2

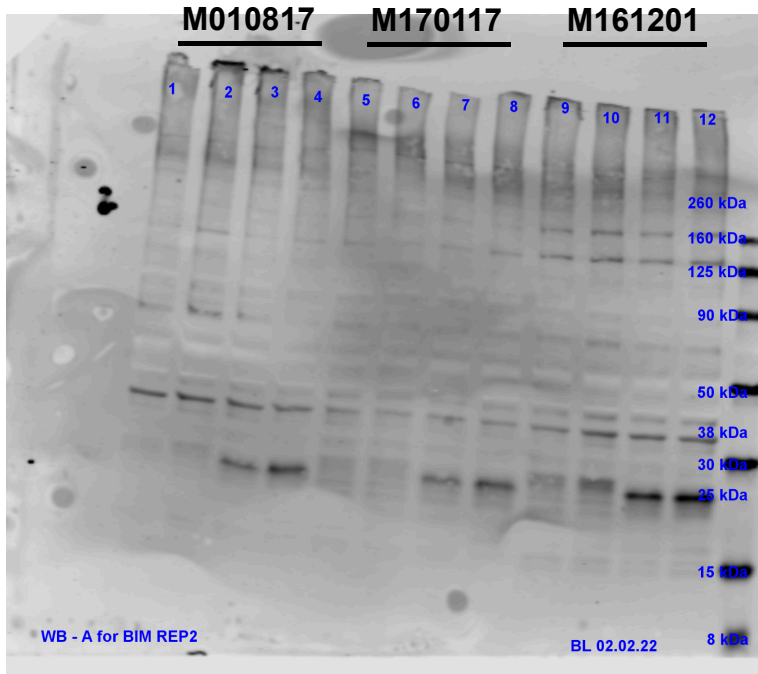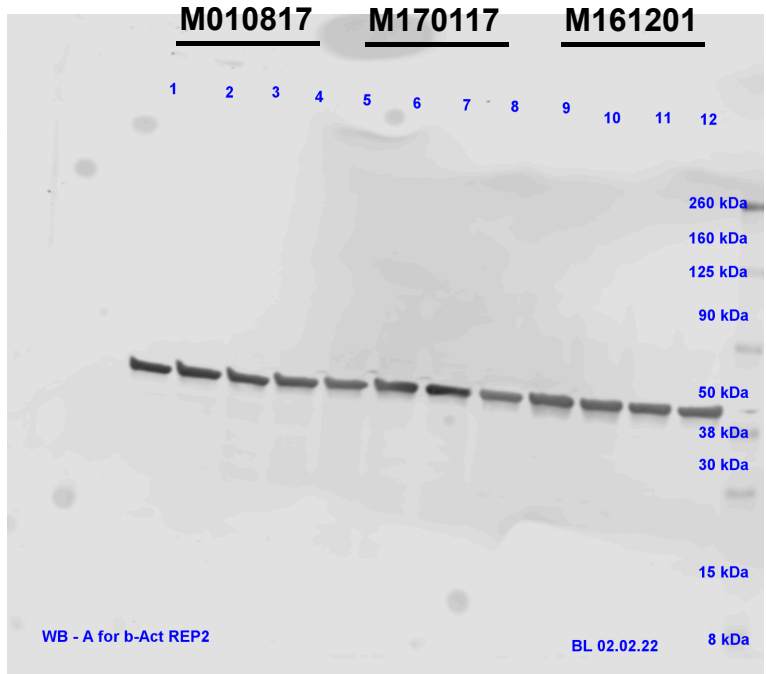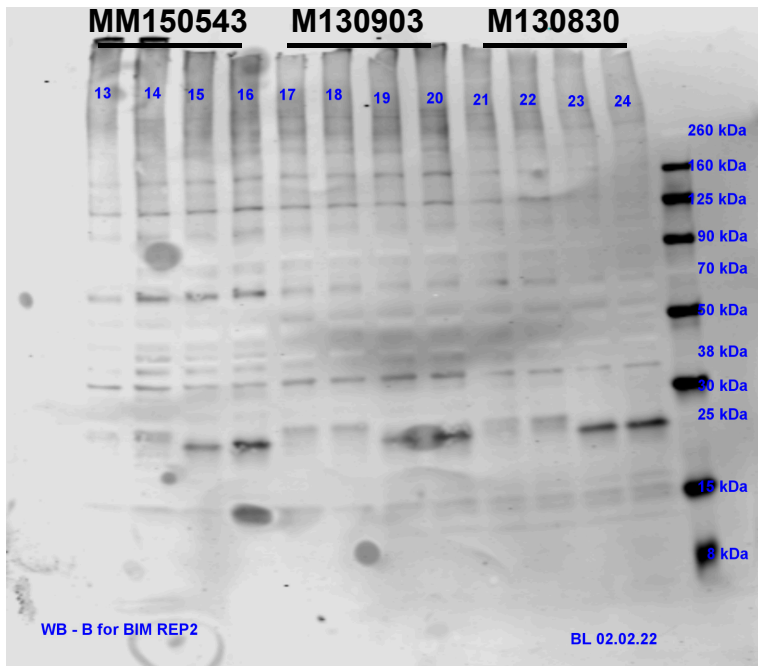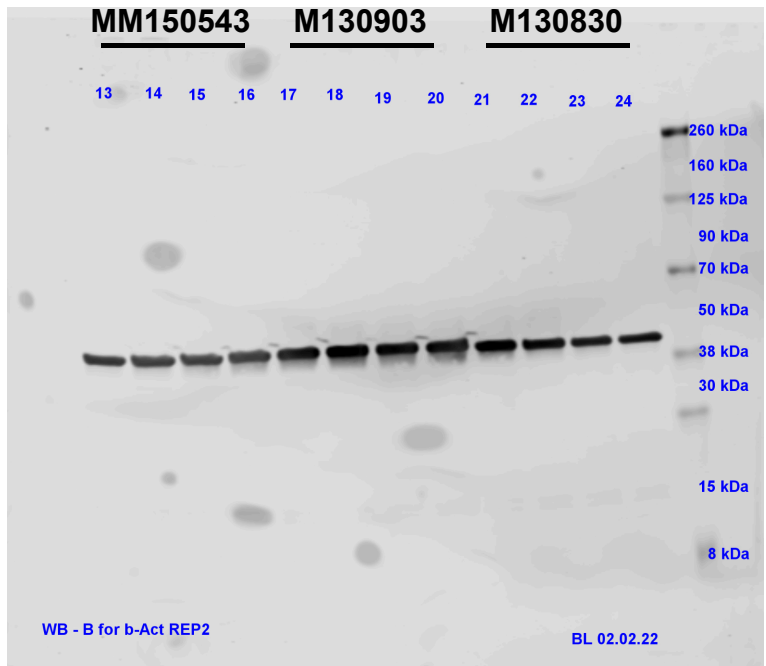

# Supplementary Figure 2D

REP3

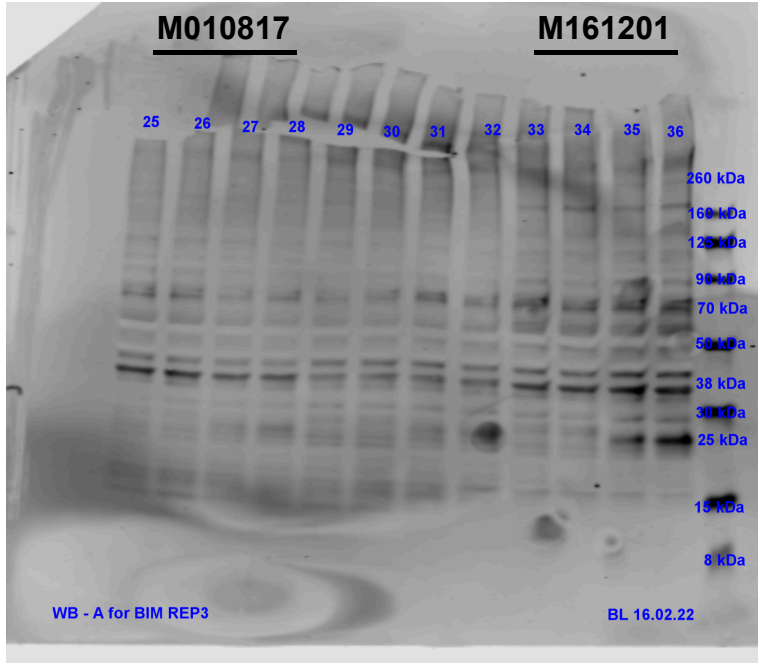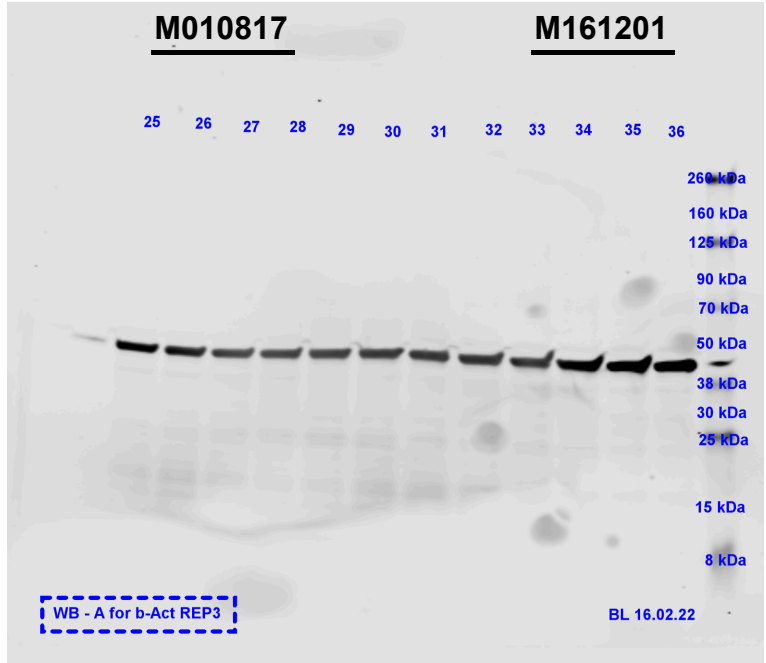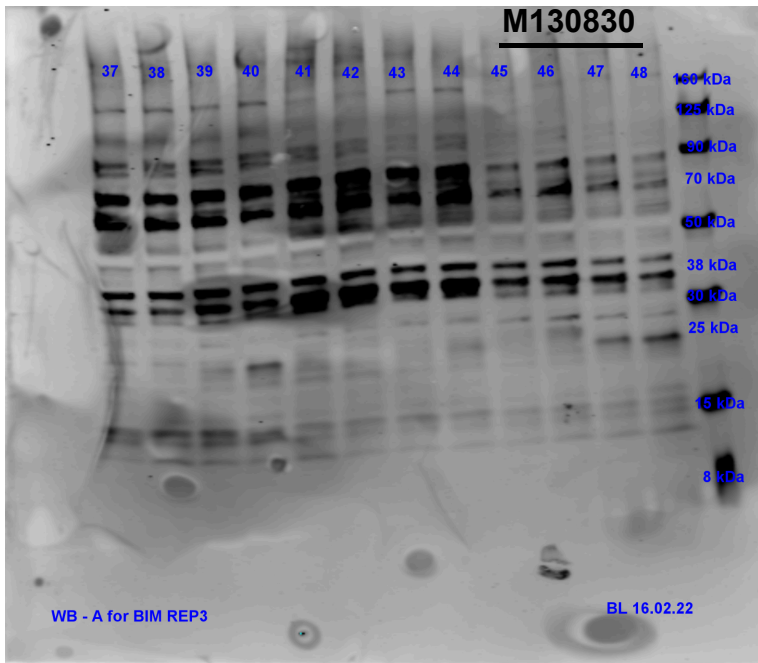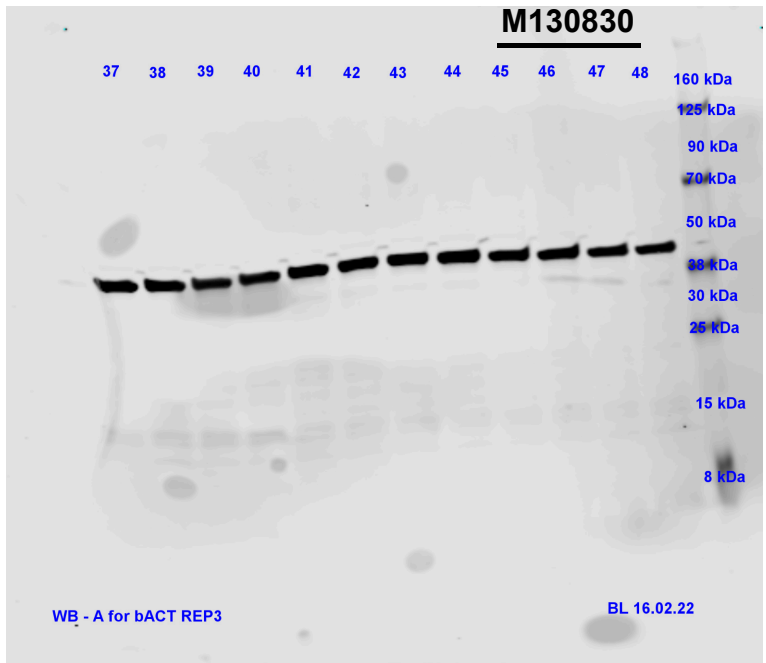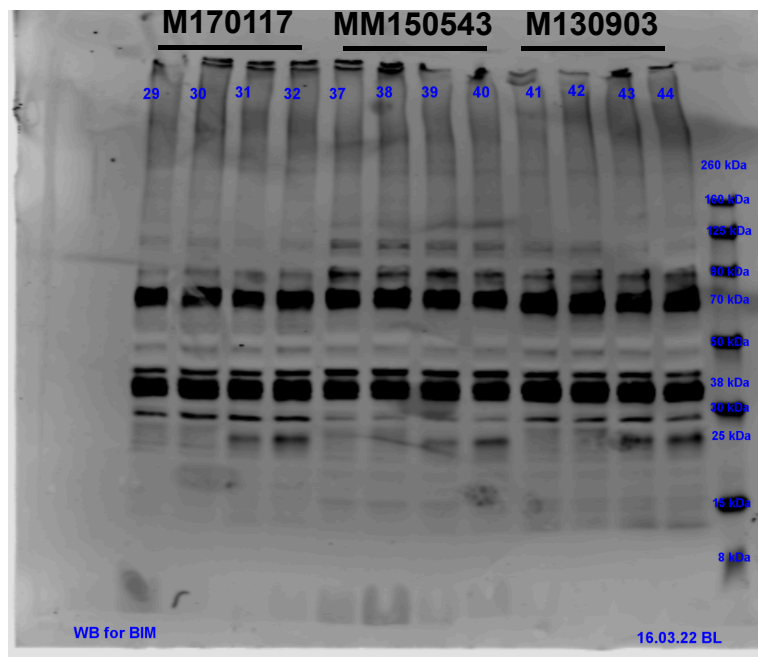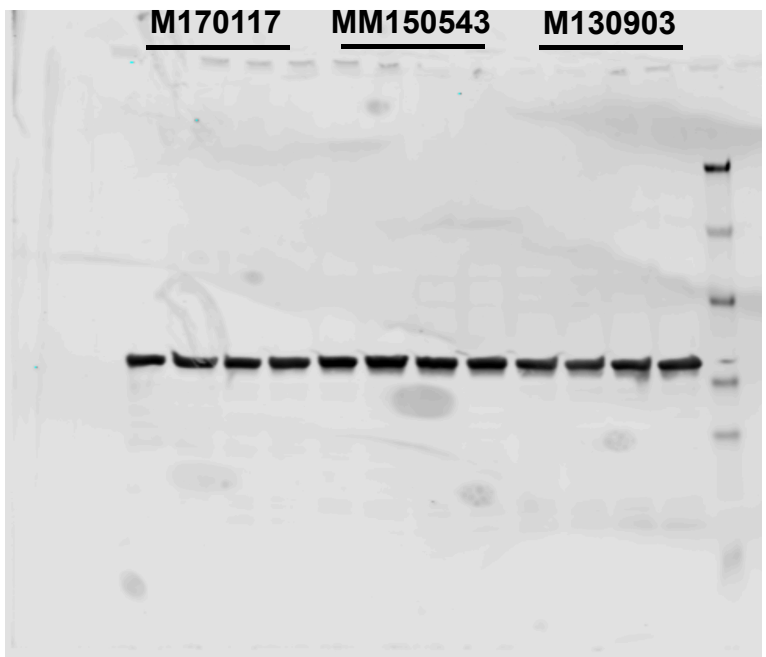

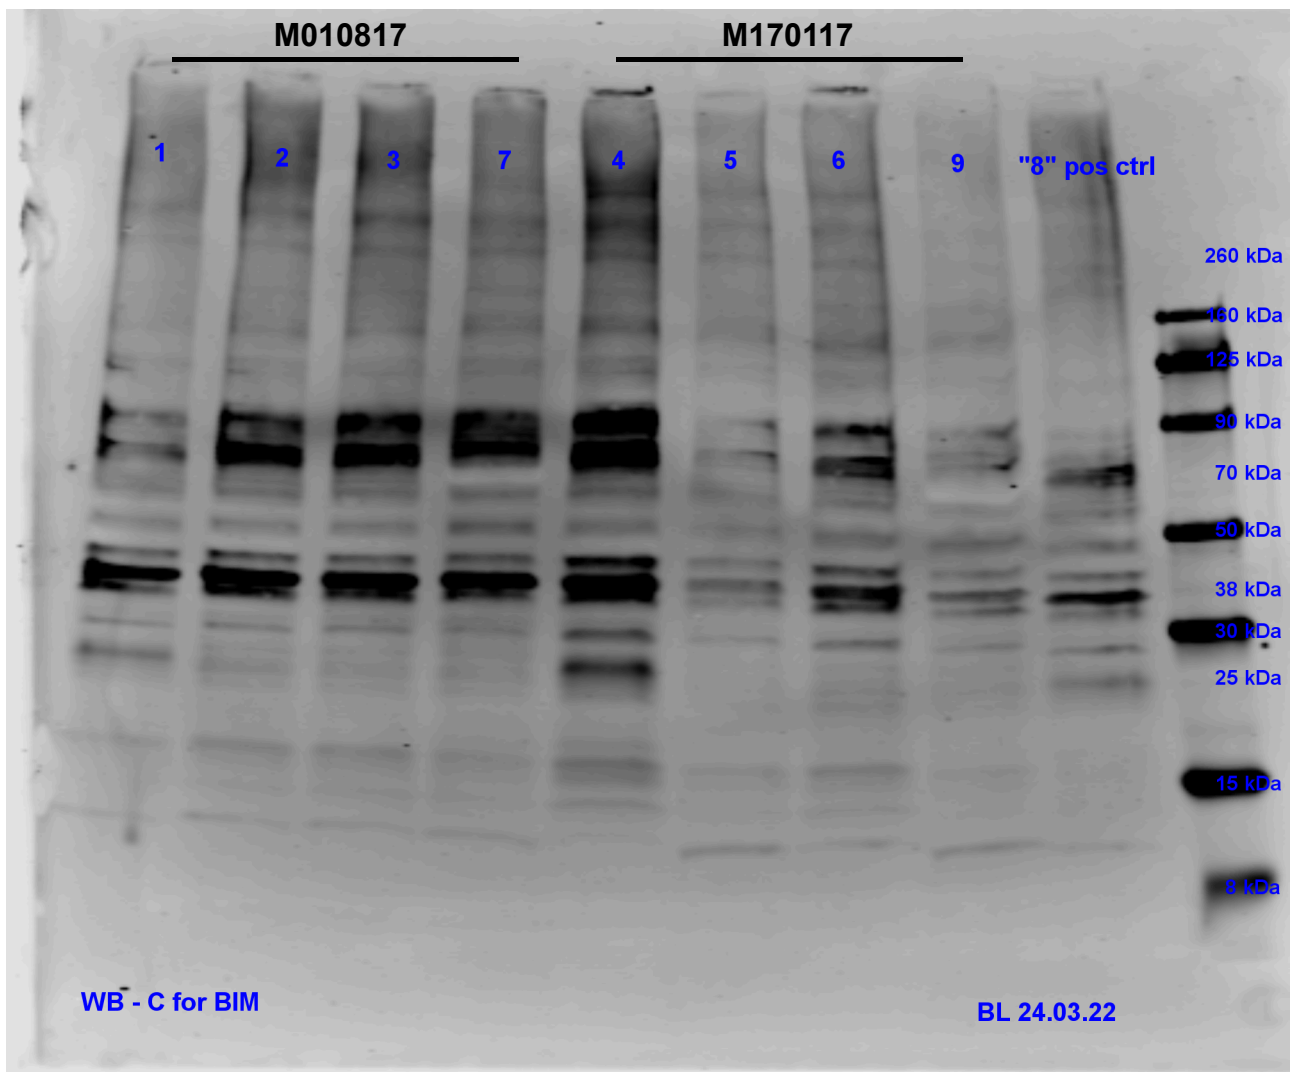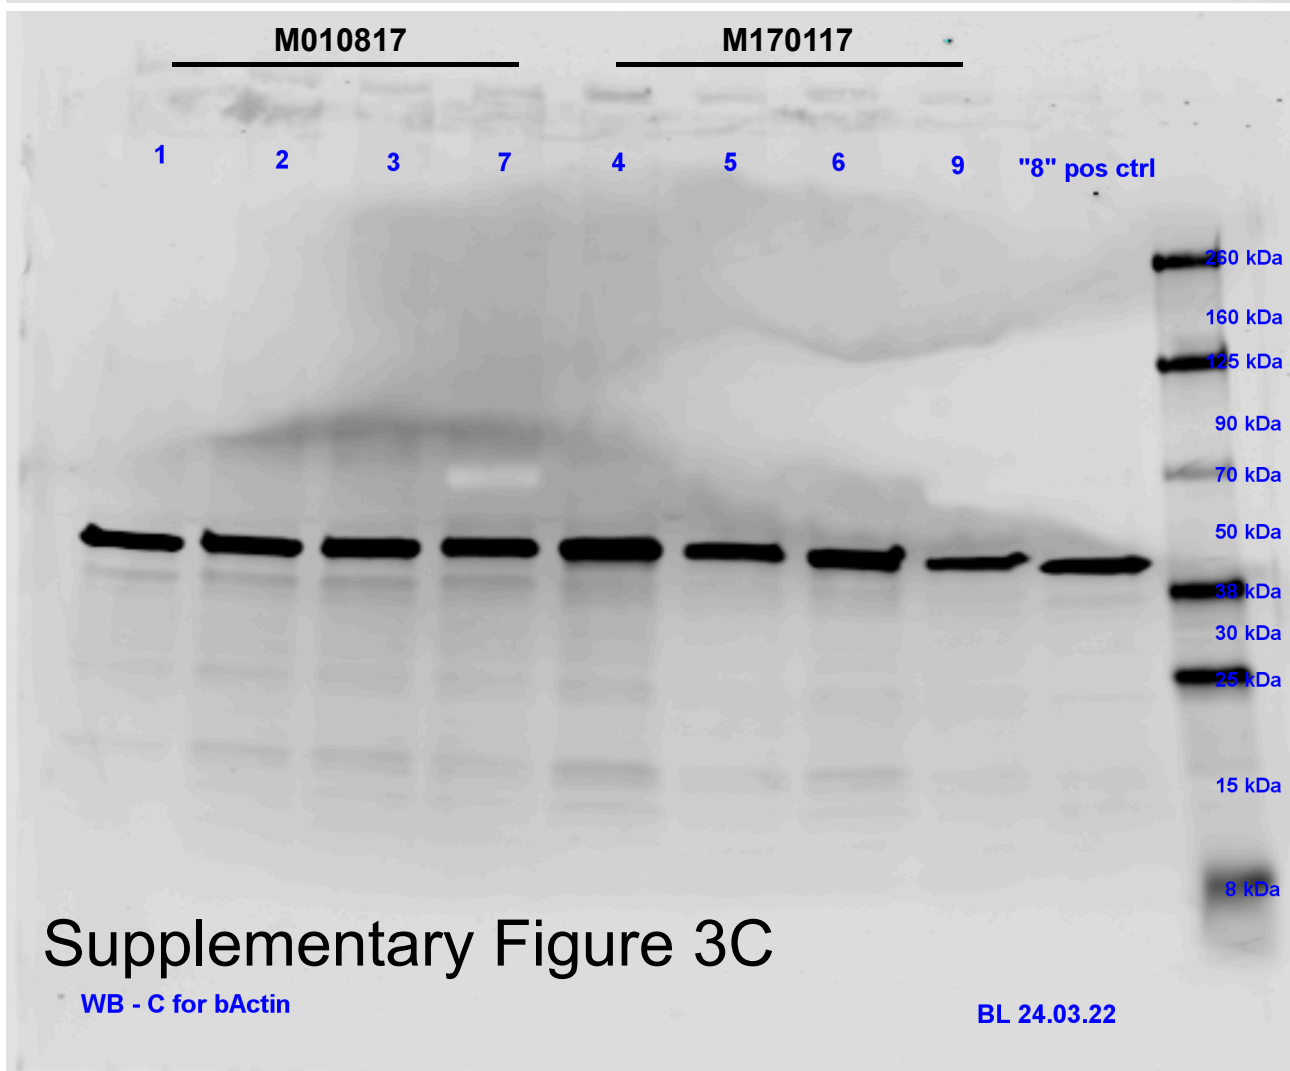

Supplementary Figure 3C

# Supplementary Figure 3D

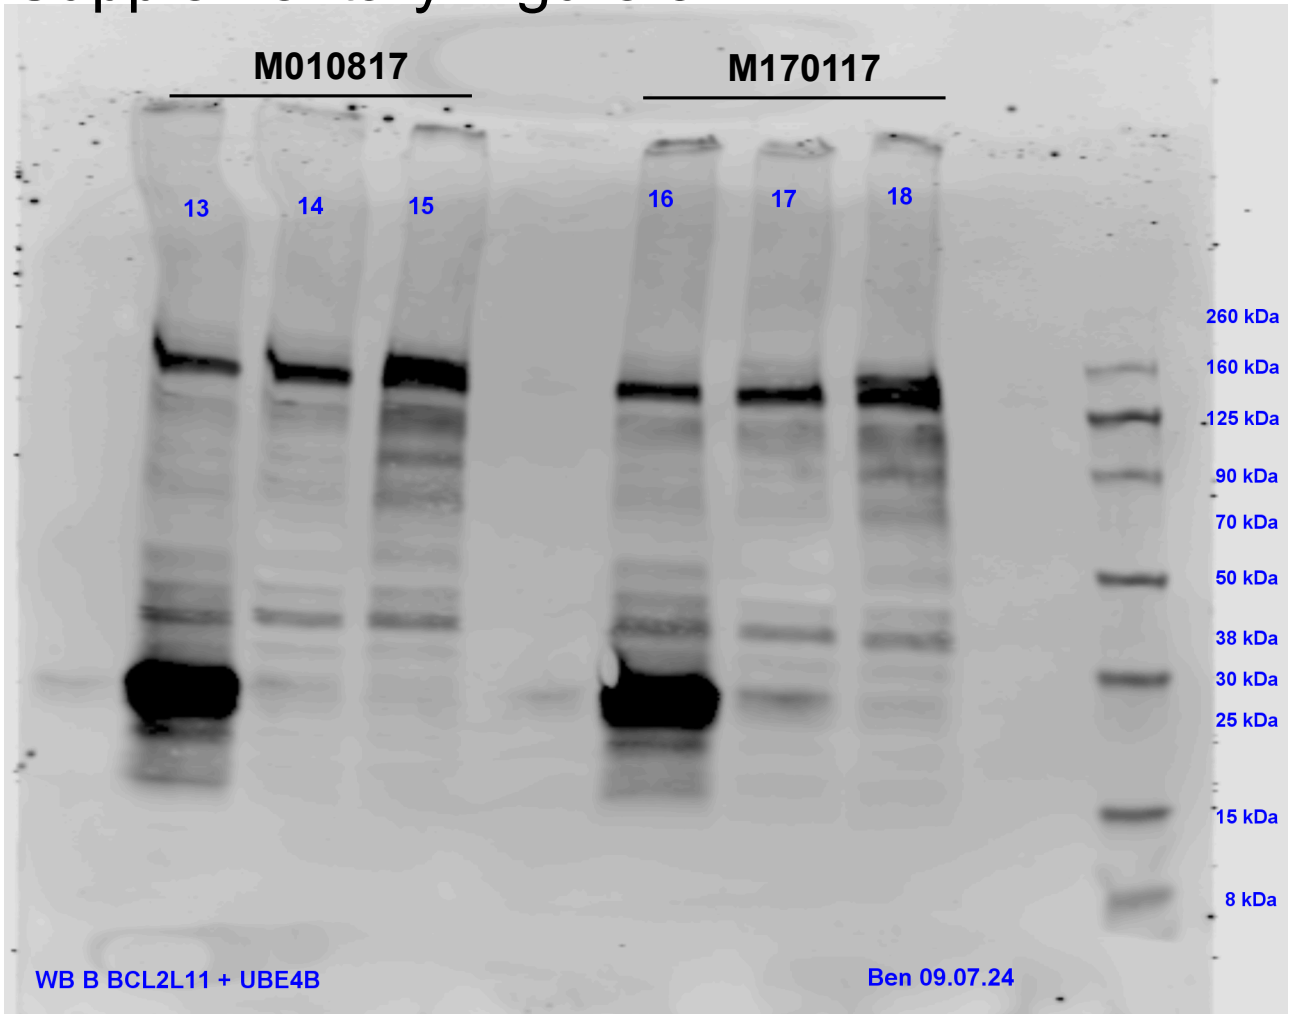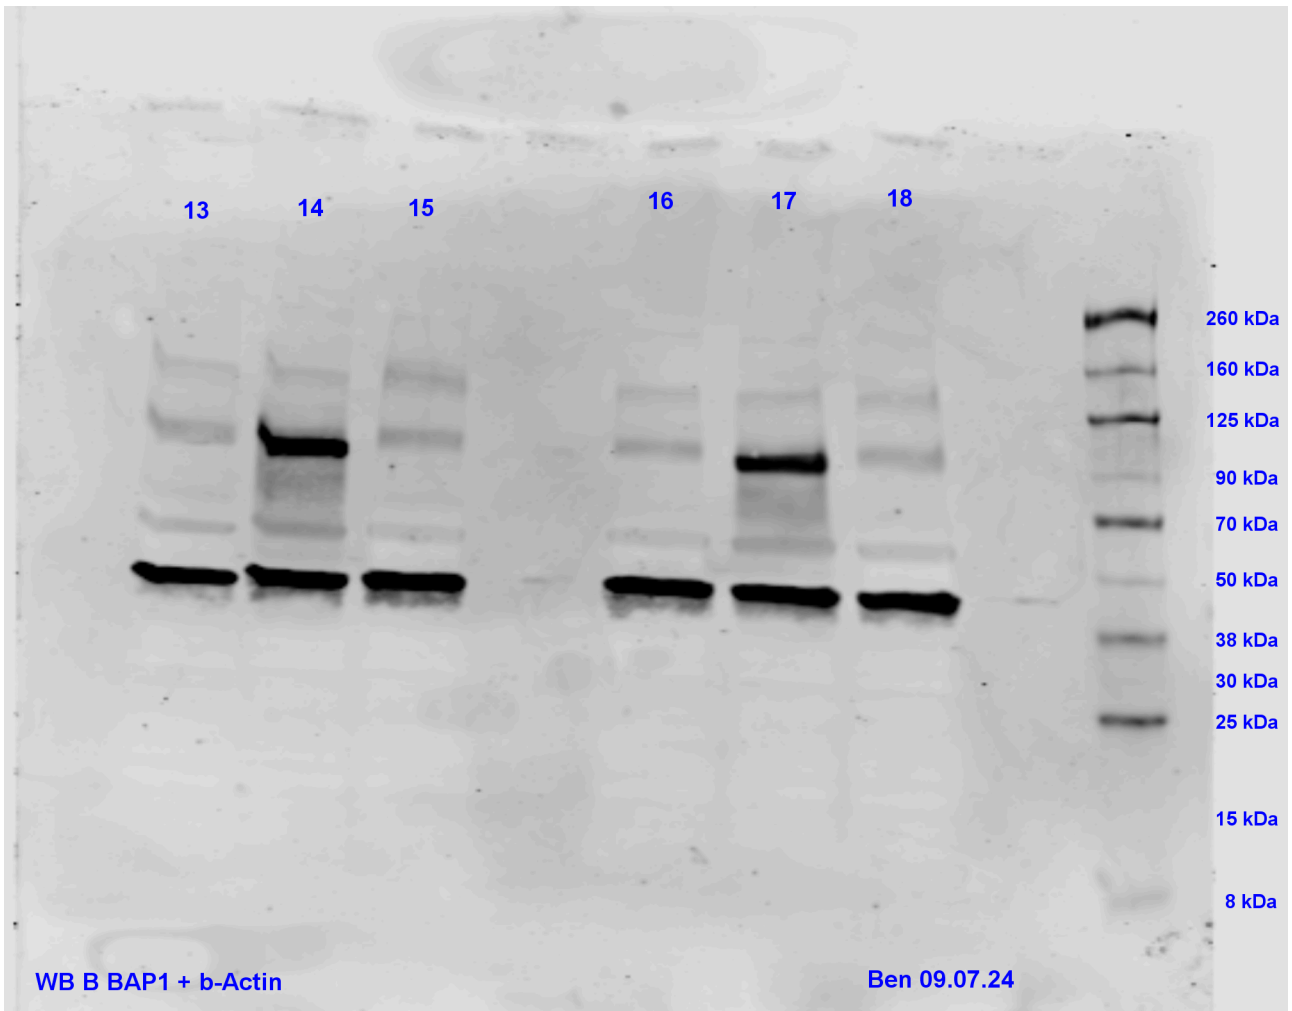

M010817

# Supplementary Figure 4B

260 kDa  
160 kDa  
125 kDa  
90 kDa  
70 kDa  
50 kDa  
38 kDa  
30 kDa  
25 kDa  
15 kDa  
8 kDa

WB for pERK

Ben 08.12.23

260 kDa  
160 kDa  
125 kDa  
90 kDa  
70 kDa  
50 kDa  
38 kDa  
30 kDa  
25 kDa  
15 kDa  
8 kDa

WB for total ERK + Histone H3

Ben 08.12.23
